# Supplementary material for: The Impact of Digital Technology on the Physical Health of Older Workers: Protocol for a Scoping Review
Source: PubMed Central journal article supplement (PMC11467605; doi:10.2196/59900), 2024-09-26
Supplement: resprot_v13i1e59900_app3.pdf [file resprot_v13i1e59900_app3.pdf]

Database: Ovid MEDLINE(R) ALL <1946 to April 18, 2024>

Search Strategy:

- 1 (physical adj (health\* or condition\* or issue\* or impairment\* or fitness or wellbeing or (well adj being) or integrit\* or state\*)):ti,ab. (63475)
- 2 Disease/ (69309)
- 3 disease\*.ti,ab. (4840202)
- 4 (vision\* or mobility or obes\* or overweight or (body adj mass adj index)):ti,ab. (904353)
- 5 exp Overweight/ (281984)
- 6 1 or 2 or 3 or 4 or 5 (5664473)
- 7 (digital or app\* or web or internet or tech\* or (social adj media) or chat or online\* or cyber or virtual or computerized or computerised or electronic or ICT).ti,ab. (10512561)
- 8 ((old\* or elder\* or ageing or ageing or senior\*) adj1 (work\* or employee\* or profession\* or labor or labour or colleague\* or staff\* or cowork\* or personnel)).ti,ab. (5531)
- 9 6 and 7 and 8 (299)

Search Name:

Date Run: 19/04/2024 04:57:46 Cochrane

Comment:

ID Search Hits

- #1 (physical NEXT (health\* or condition\* or issue\* or impairment\* or fitness or wellbeing or (well next being) or integrit\* or state\*)):ti,ab,kw (Word variations have been searched) 15416
- #2 MeSH descriptor: [Disease] explode all trees 9831
- #3 (disease\*):ti,ab,kw (Word variations have been searched) 552182
- #4 (vision\* or mobility or obes\* or overweight or (body NEXT mass NEXT index)):ti,ab,kw (Word variations have been searched) 151006
- #5 MeSH descriptor: [Overweight] explode all trees 24883
- #6 #1 or #2 or #3 or #4 or #5 670846
- #7 (digital or app\* or web or internet or tech\* or (social NEXT media) or chat or online\* or cyber or virtual or computerized or computerised or electronic or ICT):ti,ab,kw (Word variations have been searched) 680382
- #8 ((old\* or elder\* or ageing or ageing or senior\*) NEAR/1 (work\* or employee\* or profession\* or labor or labour or colleague\* or staff\* or cowrk\* or personnel)):ti,ab,kw (Word variations have been searched) 1100
- #9 #6 and #7 and #8 260

Search history

Epistemonikos

| # | Query                                                                                                                                                                                                                                                                                                                                                                                                                                                                                                                                                                                                                                                                                                                                             | Date                       | Remove |
|---|---------------------------------------------------------------------------------------------------------------------------------------------------------------------------------------------------------------------------------------------------------------------------------------------------------------------------------------------------------------------------------------------------------------------------------------------------------------------------------------------------------------------------------------------------------------------------------------------------------------------------------------------------------------------------------------------------------------------------------------------------|----------------------------|--------|
| 4 | (title:(("physical health" OR disease OR vision* OR mobility OR obesity OR overweight OR "body mass index") OR abstract:(("physical health" OR disease OR vision* OR mobility OR obesity OR overweight OR "body mass index"))) AND (title:(digital OR app OR web OR internet OR "social media" OR chat OR online* OR cyber OR virtual OR computerized OR computerised OR electronic OR ICT) OR abstract:(digital OR app OR web OR internet OR "social media" OR chat OR online* OR cyber OR virtual OR computerized OR computerised OR electronic OR ICT))) AND (title:(("older workers" OR "older employees" OR "older colleagues" OR "older staff") OR abstract:(("older workers" OR "older employees" OR "older colleagues" OR "older staff")) | 19-04-2024 12:03:32 +02:00 | ✖      |
| 3 | "older workers" or "older employees" or "older colleagues" or "older staff"                                                                                                                                                                                                                                                                                                                                                                                                                                                                                                                                                                                                                                                                       | 19-04-2024 12:03:09 +02:00 | ✖      |
| 2 | digital or app or web or internet or "social media" or chat or online* or cyber or virtual or computerized or computerised or electronic or ICT                                                                                                                                                                                                                                                                                                                                                                                                                                                                                                                                                                                                   | 19-04-2024 12:02:13 +02:00 | ✖      |
| 1 | "physical health" or disease or vision* or mobility or obesity or overweight or "body mass index"                                                                                                                                                                                                                                                                                                                                                                                                                                                                                                                                                                                                                                                 | 19-04-2024 12:01:30 +02:00 | ✖      |

5 hits
